# Supplementary material for: Efficient synthesis of novel 4-benzoyl-7-thioxo-4,6,7,8-tetrahydro-2H- pyrimido[5,4-e][1,3]oxazine-2,5(3H)-diones via one-pot three-component reaction under thermal and microwave conditions
Source: Research Square preprint supplement (doi:10.21203/rs.3.rs-1834902/v1), 2022-07-22
Supplement: Supplementary file 1 [file 13f9eaadc7b79c20f4dfa5dd.docx]

**Experimental Section**

**Instruments**

All products were obtained in the microwave conditions with the microwave digestion device model; Ethos 1 from Millston company. All melting points were obtained by Barnstead Electrothermal 9200 apparatus and are uncorrected. IR spectra were recorded on a Bruker FT-IR Equinax-55 spectrophotometer in KBr with absorption in cm-1. All the NMR spectra were recorded on a Varian model UNITY Inova 500 MHz spectrometer (1H: 500, 13C: 125 MHz) in DMSO using TMS as an internal standard. Elemental analyses were performed using a Carlo Erba EA 1108 instrument. All products were characterized by their spectral and physical data.

**General procedure for the synthesis of compounds 4a-j in thermal conditions**

A mixture of thiobarbituric acid (**1**, 1.0 mmol), aryl glyoxal (**2**, 1.5 mmol), and *N*-methyl urea (**3**, 1.0 mmol) was stirred in ethanol (5.0 mL) under reflux conditions for 1 h. After completion of the reaction, (monitored by TLC, ethyl acetate/n-hexane, 5:1). The product was filtered as a precipitate and the crude product was purified by washing with diethyl ether (twice, 5 ml).

**General procedure for the synthesis of compounds 4a-j in microwave conditions**

To improve the yield and time of the products, the above reactions were performed in microwave conditions at 700 W to 110 oC for 5 min. After completion of the reaction (monitored by TLC, ethyl acetate/n-hexane, 5:1). The product was filtered as a precipitate and the crude product was purified by washing with diethyl ether (twice, 5 ml) to obtain pure compounds **4a-j** (80-96%).

**Physical and spectral data for compounds 4a-j**

**4-(4-Methylbenzoyl)-7-thioxo-4,6,7,8-tetrahydro-2*H*-pyrimido[5,4-*e*][1,3]oxazine-2,5(3*H*)-dione (4a)**

Yellow solid; m.p. 333-335 °C. FT-IR (KBr) *ʋ*: 3270, 3257, 3128, 1764, 1693, 1618, 1016 (C=S) cm-1. 1H NMR (500 MHz, DMSO-*d*6) *δ* (ppm): 12.22 (s, 1H, NH), 11.88 (s, 1H, NH), 11.71 (s, 1H, NH), 7.12 (m, 4H, Ar), 6.08 (s, 1H, CH), 2.34 (s, 3H, CH3). 13C NMR (125 MHz, DMSO-*d*6) δ (ppm): 177.7, 170.8, 163.4, 159.7, 153.5, 138.3, 132.0, 129.5, 128.5, 92.1, 67.3, 21.1. Anal. Calcd for C14H11N3O4S (317.32): C, 52.99; H, 3.49; N, 13.24. Found: C, 53.19; H, 3.54; N, 13.12 %.

**4-(3,4-Dimethoxybenzoyl)-7-thioxo-4,6,7,8-tetrahydro-2*H*-pyrimido[5,4-*e*][1,3]oxazine-2,5(3*H*)-dione (4b)**

Yellow solid; m.p. 336-338 °C. FT-IR (KBr) *ʋ*: 3277, 3206, 3128, 1765, 1694, 1624, 1019 (C=S) cm-1. 1H NMR (500 MHz, DMSO-*d*6) *δ* (ppm): 12.22 (s, 1H, NH), 11.89 (s, 1H, NH), 11.68 (s, 1H, NH),6.90 (s, 1H, Ar), 6.87 (d, *J* = 2.1 Hz, 1H, Ar), 6.71 (d, *J* = 2.1 Hz, 1H, Ar), 6.70 (s, 1H, Ar), 3.71 (s, 6H, OCH3). 13C NMR (125 MHz, DMSO-*d*6) *δ* (ppm): 177.6, 171.5, 163.9, 160.7, 152.0, 149.5, 148.5, 128.9, 117.9, 111.7, 109.9, 91.4, 67.3, 56.1, 55.9. Anal. Calcd for C15H13N3O6S (363.34): C, 49.59; H, 3.61; N, 11.57. Found: C, 49.83; H, 3.65; N, 11.42 %.

**4-(2-Naphthoyl)-7-thioxo-4,6,7,8-tetrahydro-2*H*-pyrimido[5,4-*e*][1,3]oxazine-2,5(3*H*)-dione (4c)**

Yellow solid; m.p. 334-336 °C. FT-IR (KBr) *ʋ*: 3336, 3200, 3134, 1748, 1687, 1643, 1018 (C=S) cm-1. 1H NMR (500 MHz, DMSO-*d*6) *δ* (ppm): 12.23 (s, 1H, NH), 11.84 (s, 1H, NH), 11.79 (s, 1H, NH), 7.91 (m, 1H, Ar), 7.87 (m, 3H, Ar), 7.51 (m, 2H, Ar), 7.32 (d, *J* = 8.5 Hz, 1H, Ar), 6.29 (s, 1H, CH). 13C NMR (125 MHz, DMSO-*d*6) *δ* (ppm): 177.7, 170.4, 163.5, 159.8, 153.6, 134.2, 133.1, 133.0, 132.3, 128.7, 128.4, 127.9, 127.0, 126.8, 125.8, 92.3, 67.7. Anal. Calcd for C17H11N3O4S (353.35): C, 57.79; H, 3.14; N, 11.89. Found: C, 57.41; H, 3.09; N, 11.68 %.

**4-(4-Chlorobenzoyl)-7-thioxo-4,6,7,8-tetrahydro-2*H*-pyrimido[5,4-*e*][1,3]oxazine-2,5(3*H*)-dione (4d)**

Yellow solid; m.p. 348-350 °C. FT-IR (KBr) *ʋ*: 3414, 3205, 3126, 1771, 1619, 1685, 1013 (C=S) cm-1. 1H NMR (500 MHz, DMSO-*d*6) *δ* (ppm): 12.25 (s, 1H, NH), 11.91 (s, 1H, NH), 11.73 (s, 1H, NH), 7.37 (m, 2H, Ar), 7.28 (m, 2H, Ar), 6.13 (s, 1H, CH). 13C NMR (125 MHz, DMSO-*d*6) *δ* (ppm): 177.8, 169.9, 163.4, 159.8, 153.5, 133.5, 130.6, 129.0, 126.5, 92.3, 66.8. Anal. Calcd for C13H8ClN3O4S (337.73): C, 46.23; H, 2.39; N, 12.44. Found: C, 46.51; H, 2.47; N, 12.43 %.

**4-(4-Fluorobenzoyl)-7-thioxo-4,6,7,8-tetrahydro-2*H*-pyrimido[5,4-*e*][1,3]oxazine-2,5(3*H*)-dione (4e)**

Yellow solid; m.p. 337-339 °C. FT-IR (KBr) *ʋ*: 3263, 3126, 3200, 1767, 1680, 1615, 1027 (C=S) cm-1. 1H NMR (500 MHz, DMSO-*d*6) *δ* (ppm): 12.22 (s, 1H, NH), 11.88 (s, 1H, NH), 11.70 (s, 1H, NH), 7.30 (d, *J* = 5.2 Hz, 2H, Ar), 7.14 (d, *J* = 7.0 Hz, 2H, Ar), 6.14 (s, 1H, CH). 13C NMR (125 MHz, DMSO-*d*6) *δ* (ppm): 177.8, 170.3, 163.4, 159.7, 153.5, 131.3, 130.8, 115.9, 115.7, 92.2, 66.7. Anal. Calcd for C13H8FN3O4S (321.28): C, 48.60; H, 2.51; N, 13.08. Found: C, 48.89; H, 2.56; N, 12.89 %.

**4-(4-Nitrobenzoyl)-7-thioxo-4,6,7,8-tetrahydro-2*H*-pyrimido[5,4-*e*][1,3]oxazine-2,5(3*H*)-dione (4f)**

Yellow solid; m.p. 345-347 °C. FT-IR (KBr) *ʋ*: 3309, 3220, 3187, 1748, 1680, 1658, 1585, 1027(C=S) cm-1. 1H NMR (500 MHz, DMSO-*d*6) *δ* (ppm): 12.27 (s, 1H, NH), 11.92 (s, 1H, NH), 11.79 (s, 1H, NH), 8.18 (d, *J* = 8.3 Hz, 2H, Ar), 7.56 (d, *J* = 7.8 Hz, 2H, Ar), 6.27 (s, 1H, CH); 13C NMR (125 MHz, DMSO-*d*6) *δ* (ppm): 177.8, 169.0, 163.2, 153.6, 147.8, 130.1, 127.2, 124.1, 123.6, 92.4, 66.7. Anal. Calcd for C13H8N4O6S (348.29): C, 44.83; H, 2.32; N, 16.09. Found: C, 45.22; H, 2.38; N, 16.18 %.

**4-(4-Methoxybenzoyl)-7-thioxo-4,6,7,8-tetrahydro-2*H*-pyrimido[5,4-*e*][1,3]oxazine-2,5(3*H*)-dione (4g)**

Yellow solid; m.p. 358-360 °C. FT-IR (KBr) *ʋ*: 3275, 3195, 3129, 1765, 1692, 1621, 1020 (C=S) cm-1. 1H NMR (500 MHz, DMSO-*d*6) *δ* (ppm): 12.22 (s, 1H, NH), 11.89 (s, 1H, NH), 11.71 (s, 1H, NH), 7.16 (d, *J* = 8.3 Hz, 2H, Ar), 6.88 (d, *J* = 7.8 Hz, 2H, Ar), 6.08 (s, 1H, CH), 3.71 (s,3H, OCH3). 13C NMR (125 MHz, DMSO-d6) *δ* (ppm): 177.6, 171.7, 163.9, 159.8, 151.9, 128.5, 127.1, 114.4, 113.9, 91.4, 67.2, 55.0. Anal. Calcd for C14H11N3O5S (333.32): C, 50.45; H, 3.33; N, 12.61. Found: C, 50.24; H, 3.28; N, 12.50 %.

**4-(4-Bromobenzoyl)-7-thioxo-4,6,7,8-tetrahydro-2*H*-pyrimido[5,4-*e*][1,3]oxazine-2,5(3*H*)-dione (4h)**

Yellow solid; m.p. 350-352 °C. FT-IR (KBr) *ʋ*: 3288, 3129, 3185, 1769, 1691, 1620, 1012 (C=S) cm-1. 1H NMR (500 MHz, DMSO-*d*6) *δ* (ppm): 12.22 (s, 1H, NH), 11.89 (s, 1H, NH), 11.71 (s, 1H, NH), 7.53 (d, *J* = 8.7 Hz, 2H, Ar), 7.22 (d, *J* = 7.8 Hz, 2H, Ar), 6.12 (s, 1H, CH). 13C NMR (125 MHz, DMSO-*d*6) *δ* (ppm): 177.8, 169.8, 163.3, 159.8, 134.5, 131.8, 130.9, 126.8, 122.0, 92.3, 66.9. Anal. Calcd for C13H8BrN3O4S (382.19): C, 40.86; H, 2.11; N, 10.99. Found: C, 40.94; H, 2.16; N, 11.27 %.

**4-(2-Methoxybenzoyl)-7-thioxo-4,6,7,8-tetrahydro-2*H*-pyrimido[5,4-*e*][1,3]oxazine-2,5(3*H*)-dione (4i)**

Yellow solid; m.p. 349-351 °C. FT-IR (KBr) *ʋ*: 3316, 3200, 3160, 1745, 1687, 1644, 1044 (C=S) cm-1. 1H NMR (500 MHz, DMSO-*d*6) *δ* (ppm): 12.14 (s, 1H, NH), 11.78 (s, 1H, NH), 11.66 (s, 1H, NH), 7.27 (t, *J* = 7.8 Hz, 2H, Ar), 6.90-6.98 (m, 2H, Ar), 6.07 (s, 1H, CH), 3.61 (s, 3H, OCH3). 13C NMR (125 MHz, DMSO-d6) *δ* (ppm): 177.7, 163.50, 159.0, 157.5, 144.5, 135.4, 130.4, 129.5, 128.2, 120.2, 112.5, 91.8, 67.4, 56.3. Anal. Calcd for C14H11N3O5S (333.32): C, 50.45; H, 3.33; N, 12.61. Found: C, 50.18; H, 3.27; N, 12.74 %.

**4-(3-Nitrobenzoyl)-7-thioxo-4,6,7,8-tetrahydro-2*H*-pyrimido[5,4-*e*][1,3]oxazine-2,5(3*H*)-dione (4j)**

Yellow solid; m.p. 340-342 °C. FT-IR (KBr) *ʋ*: 3230, 3204, 3170, 1751, 1656, 1610, 1021 (C=S) cm-1. 1H NMR (500 MHz, DMSO-*d*6) *δ* (ppm): 12.27 (s, 1H, NH), 11.91 (s, 1H, NH), 11.78 (s, 1H, NH), 8.22 (s, 1H, Ar), 8.18 (d, *J* = 8.8 Hz, 1H, Ar), 7.68 (d, *J* = 7.5 Hz, 1H, Ar), 7.63 (t, *J* = 7.9 Hz, 1H, Ar), 6.33 (s, 1H, CH). 13C NMR (125 MHz, DMSO-*d*6) *δ* (ppm): 171.9, 167.6, 162.9, 161.9, 157.3, 150.6, 141.6, 138.9, 133.1, 126.8, 125.3, 109.9, 92.1, 65.6. Anal. Calcd for C13H8N4O6S (348.29): C, 44.83; H, 2.32; N, 16.09. Found: C, 44.97; H, 2.38; N, 16.20 %.
